# Supplementary material for: Enhanced n-dodecane hydroisomerization performance by tailoring acid sites on bifunctional Pt/ZSM-22 via alkaline treatment
Source: Royal Society of Chemistry journal article supplement (doi:10.1039/c7nj03417b), 2017-11-27
Supplement: c7nj03417b1.pdf [file c7nj03417b1.pdf]

Supplementary information for:

**Enhanced n-dodecane hydroisomerization performance by  
tailoring acid sites on bifunctional Pt/ZSM-22 via alkaline treatment**

Xian Wu<sup>a, b</sup>, Minghuang Qiu<sup>b</sup>, Xinqing Chen<sup>b\*</sup>, Gan Yu<sup>b</sup>, Xing Yu<sup>a, b</sup>, Chengguang Yang<sup>b</sup>, Jian Sun<sup>a</sup>, Ziyu Liu<sup>b\*</sup>, Yuhan Sun<sup>b</sup>

<sup>a</sup>School of Environmental and Chemical Engineering, Shanghai University, Shanghai 201900,  
China

<sup>b</sup>Advanced Research Institute, Chinese Academy of Sciences, Shanghai 201210, China.

\*Corresponding Author: Xinqing Chen (chenxq@sari.ac.cn), Ziyu Liu (liuziyu@sari.ac.cn)

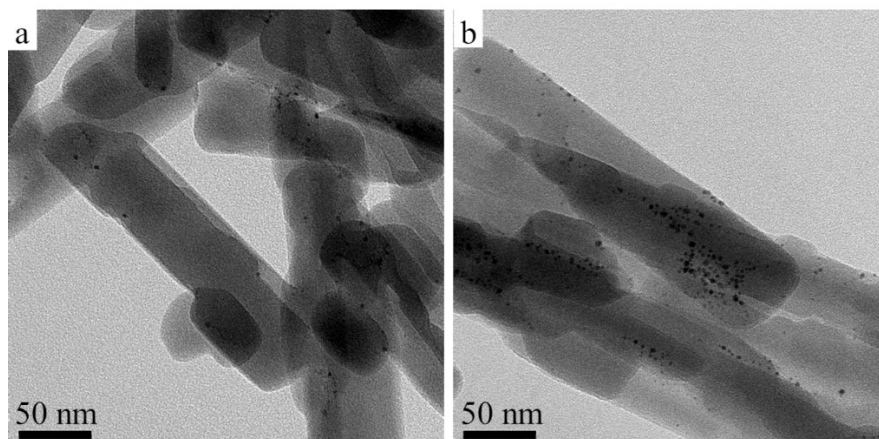

Figure S1. TEM images of Pt/ZAT-0.7; fresh catalyst (a) and the catalyst after the reaction (b).

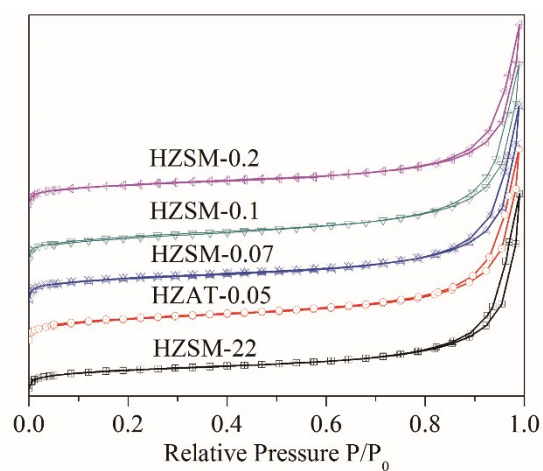

Figure S2 N<sub>2</sub> adsorption-desorption isotherms of parent and alkaline-treated samples

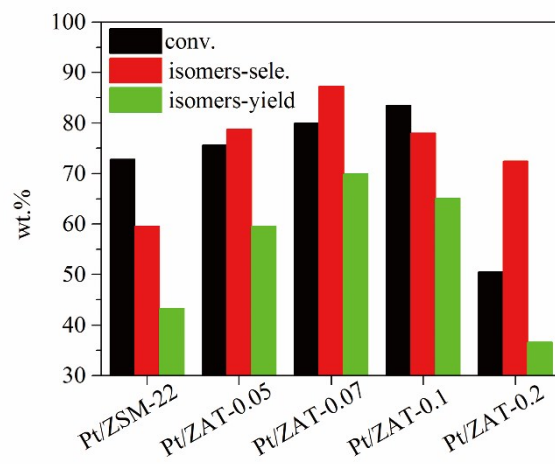

Figure S3 The hydroisomerization of n-dodecane on parent and alkaline-treated samples. (T=280°C, P=2.0 MPa,  $V_{H_2}/V_{n-C_{12}}=600:1$ , and  $WHSV=2.0\text{ h}^{-1}$ .)

Table S1 Result of CO-chemisorption over Pt-ZSM-22 and Pt-ZAT-0.7

| Catalysts  | Pt dispersion(%) | Pt crystal sizes <sup>a</sup> (nm) |
|------------|------------------|------------------------------------|
| Pt/ZSM-22  | 41.3%            | 2.7                                |
| Pt/ZAT-0.7 | 40.7%            | 2.7                                |

<sup>a</sup> Active particle diameter(hemisphere)

Table S2 The selectivity of *n*-dodecane hydroisomerization on Pt/ZAT-0.07.

| Temperature(°C)                  | 260  | 270  | 280  | 290  | 300  |
|----------------------------------|------|------|------|------|------|
| Conversion (%)                   | 23.6 | 42.6 | 80.0 | 91.3 | 94.6 |
| S <sub>T</sub> (%)               | 89.9 | 89.3 | 87.3 | 61.8 | 37.3 |
| S <sub>Mo</sub> (%)              | 84.3 | 82.8 | 76.6 | 47.3 | 22.4 |
| S <sub>Di</sub> (%)              | 5.6  | 6.5  | 10.7 | 14.5 | 14.9 |
| S <sub>Mo</sub> /S <sub>Di</sub> | 15.1 | 12.7 | 7.2  | 3.3  | 1.5  |

The method of calculating the number of Al species in the sample

Equation S1:

$$\textit{The number of Al} = \frac{1 \textit{ g} \times \textit{the bulky percentage of Al in zeolites}}{\textit{molar mass of Al}}$$
